# Supplementary material for: Myotis fimbriatus Virome, a Window to Virus Diversity and Evolution in the Genus Myotis
Source: MDPI journal article supplement (doi:10.3390/v14091899), 2022-08-27
Supplement: s1 [file s1]

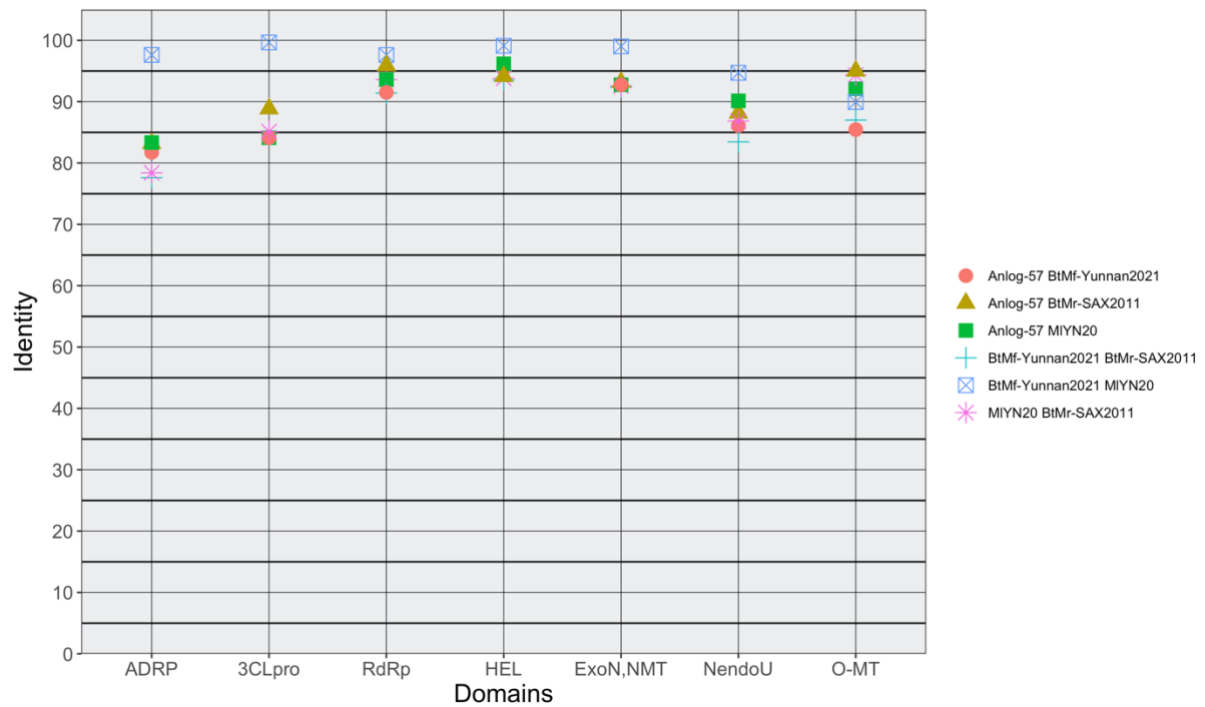

**Figure S1. Pairwise identity among conserved domains.** Amino acid identity was estimated between the conserved domains in myotacovirus sequences. ADRP: ADP-ribose-1'-phosphatase, 3CLpro: 3C-like protease, RdRp: RNA dependent RNA polymerase, HEL: helicase, ExoN: 3'-5' exoribonuclease, NMT: N7-methyltransferase, NendoU: nidoviral uridylyate-specific endoribonuclease, O-MT: ribose-2'-O-methyltransferase.

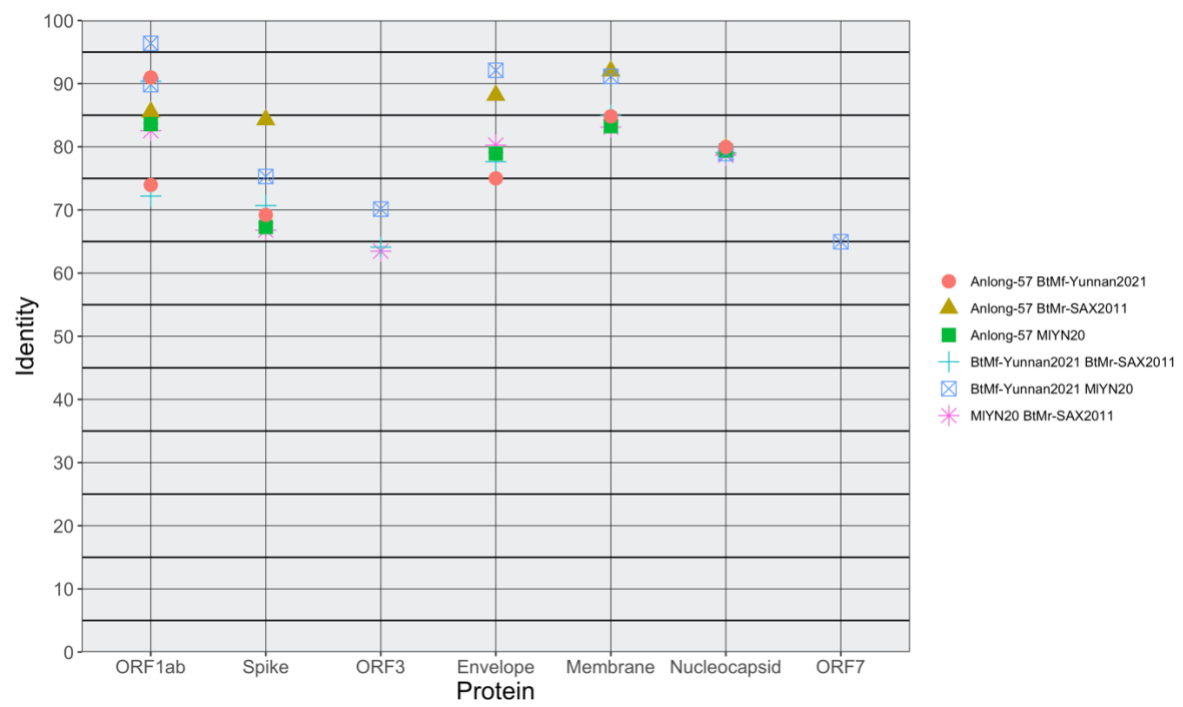

**Figure S2. Pairwise identity proteins.** Amino acid identity among myotacovirus proteins.

A.

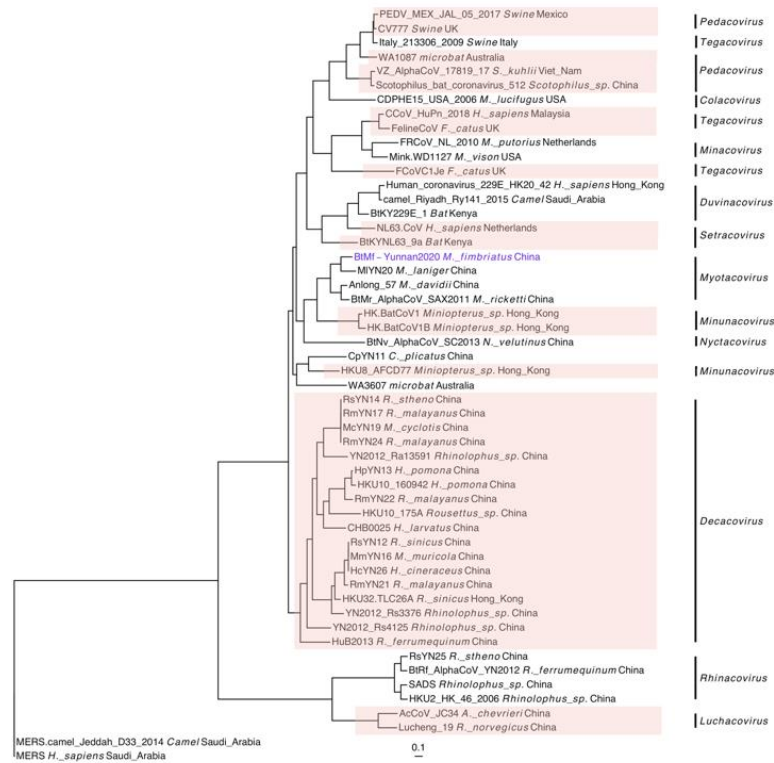

B.

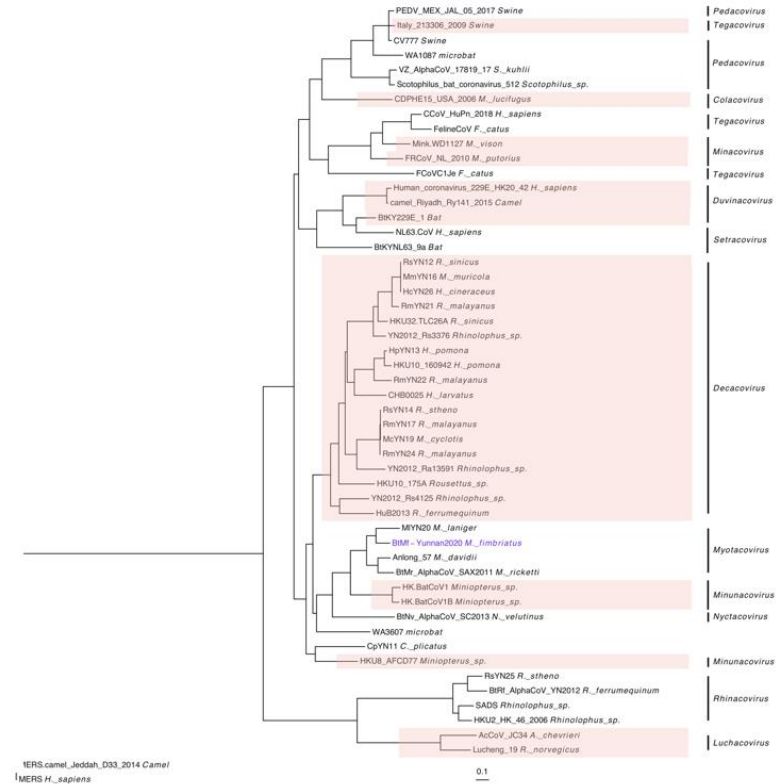

**Figure S3. Alphacoronavirus spike phylogeny.** (A) Phylogenetic tree of the alphacoronavirus spike protein sequences (1,268 a.a.). The tree inference was based on the LG+I+G model. (B) Phylogenetic tree of spike subunit 1 (469 a.a.). The inference was made under the Whelan and Goldman (WAG) model with gamma distributed rate variation among sites and proportion of invariable sites.

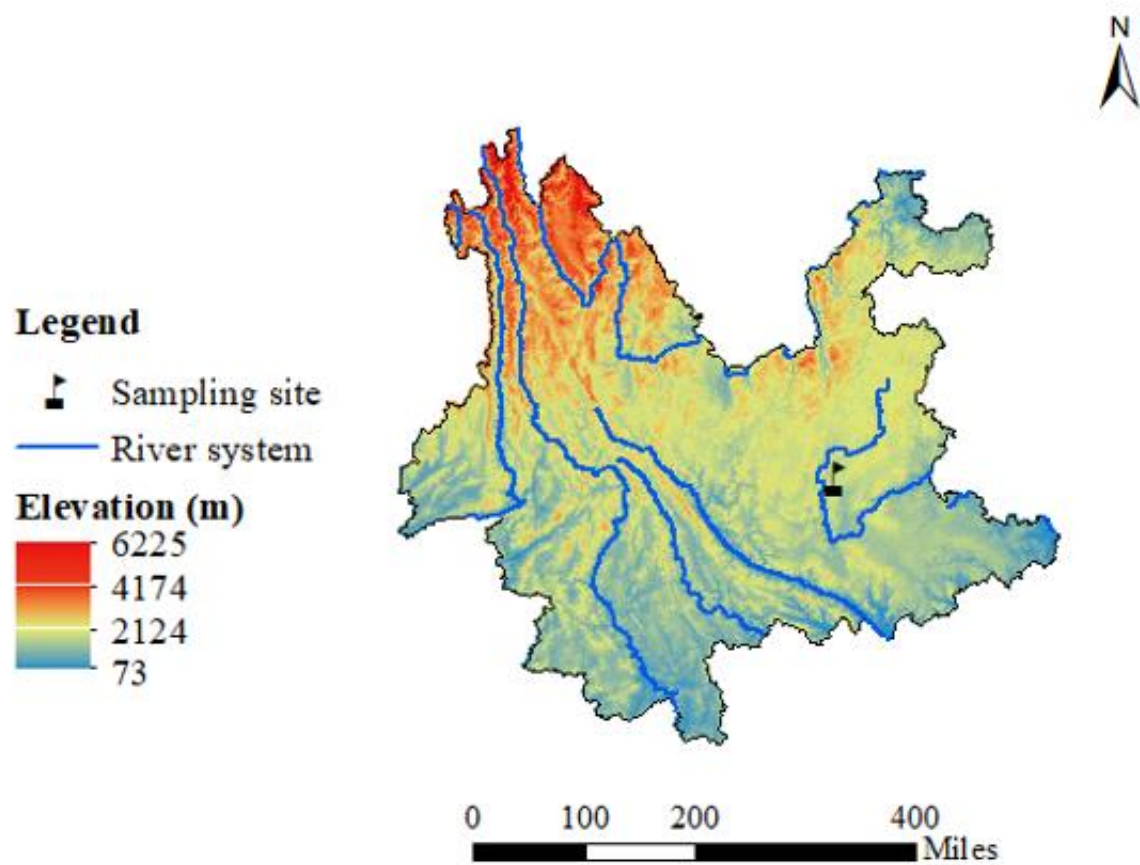

**Figure S4. Sampling site in Yunnan province.** This map represents the relief and some of the main rivers of the Yunnan province in China. The cave is located close to the Nanpan river in Boluohei county.
