# Supplementary material for: Myotis fimbriatus Virome, a Window to Virus Diversity and Evolution in the Genus Myotis
Source: MDPI journal article supplement (doi:10.3390/v14091899), 2022-08-27
Supplement: s1 [file s1]

**Table S1. Information on collected samples**

| Individual no. | Sample type | Sampling location              | Location type | Concentration of RNA <sup>a</sup> |
|----------------|-------------|--------------------------------|---------------|-----------------------------------|
| 1              | Rectal swab | Shilin county, Kunming, Yunnan | Cave          | 10.5                              |
| 2              | Rectal swab | Shilin county, Kunming, Yunnan | Cave          | 4.6                               |
| 3              | Rectal swab | Shilin county, Kunming, Yunnan | Cave          | —                                 |
| 4              | Rectal swab | Shilin county, Kunming, Yunnan | Cave          | —                                 |
| 5              | Rectal swab | Shilin county, Kunming, Yunnan | Cave          | —                                 |
| 6              | Rectal swab | Shilin county, Kunming, Yunnan | Cave          | —                                 |
| 7              | Rectal swab | Shilin county, Kunming, Yunnan | Cave          | 5.38                              |
| 8              | Rectal swab | Shilin county, Kunming, Yunnan | Cave          | —                                 |
| 9              | Rectal swab | Shilin county, Kunming, Yunnan | Cave          | —                                 |
| 10             | Rectal swab | Shilin county, Kunming, Yunnan | Cave          | —                                 |
| 11             | Rectal swab | Shilin county, Kunming, Yunnan | Cave          | 4.4                               |
| 12             | Rectal swab | Shilin county, Kunming, Yunnan | Cave          | —                                 |
| 13             | Rectal swab | Shilin county, Kunming, Yunnan | Cave          | —                                 |
| 14             | Rectal swab | Shilin county, Kunming, Yunnan | Cave          | —                                 |
| 15             | Rectal swab | Shilin county, Kunming, Yunnan | Cave          | —                                 |
| 16             | Rectal swab | Shilin county, Kunming, Yunnan | Cave          | —                                 |
| 17             | Rectal swab | Shilin county, Kunming, Yunnan | Cave          | —                                 |
| 18             | Rectal swab | Shilin county, Kunming, Yunnan | Cave          | —                                 |
| 19             | Rectal swab | Shilin county, Kunming, Yunnan | Cave          | —                                 |
| 20             | Rectal swab | Shilin county, Kunming, Yunnan | Cave          | 4.8                               |

a—, the concentration was below 5 ng/μL and tested by Qubit.
